# Supplementary material for: Insights into urinary catheter colonisation and polymicrobial biofilms of Candida- bacteria under flow condition
Source: Research Square preprint supplement (doi:10.21203/rs.3.rs-5407606/v1), 2025-04-14
Supplement: Supplementary file 1 [file 2ea3590384b1c80558710008.xlsx]

## Sheet: Sheet1
	ISOLATES FROM URINARY CATHETER
	Catheter code	Days of catheterisation	Gender of patient	Age (years)	Type of catheter	Microbial growth observed upon culturing	Type of colonisation	Type of organism	Isolate name	Identified Organism
	BU01	11	M	43	Silicone coated latex	Yes	Polymicrobial colonisation	Mixed-species biofilm	U01.1	Providencia vermicola
									U01.2	Candida tropicalis
	BU02	10	F	55	Silicone coated latex	Yes	Polymicrobial colonisation	Mixed-species biofilm	U02.1	Candida albicans
									U02.2	Klebsiella pneumoniae
									U02.3	Pseudomonas aeruginosa
	BU03	16	M	59	Silicone coated latex	Yes	Polymicrobial colonisation	Poly-bacterial biofilm	U03.1	Enterococcus faecium
									U03.2	E. coli
	BU04	10	M	34	Silicone coated latex	Yes	Monomicrobial colonisation	Mono-bacterial biofilm	U04	Klebsiella pneumoniae
	BU05	8	F	52	Silicone coated latex	Yes	Polymicrobial colonisation	Mixed-species biofilm	U05.1	Pseudomonas aeruginosa
									U05.2	Candida albicans
	BU06	10	M	47	Silicone coated latex	Yes	Polymicrobial colonisation	Mixed-species biofilm	U06.1	Candida tropicalis
									U06.2	Enterococcus faecium
	BU07	7	M	37	Silicone coated latex	Yes	Monomicrobial colonisation	Mono-bacterial biofilm	U07	Enterococcus faecium
	BU08	3	M	27	Silicone coated latex	No	No colonisation	-	-	-
	BU09	3	M	42	Silicone coated latex	No	No colonisation	-	-	-
	BU10	15	F	47	Silicone coated latex	Yes	Polymicrobial colonisation	Poly-fungal biofilm	U10.1	Trichosporon asahii
									U10.2	Candida albicans
	BU11	7	M	56	Silicone coated latex	Yes	Polymicrobial colonisation	Mixed-species biofilm	U11.1	Stenotrophomonas maltophilia
									U11.2	Candida kefyr
	BU12	5	M	12	Silicone coated latex	Yes	Monomicrobial colonisation	Mono-bacterial biofilm	U12	Klebsiella pneumoniae
	BU13	10	M	32	Silicone coated latex	Yes	Polymicrobial colonisation	Mixed-species biofilm	U13.1	Staphylococcus haemolyticus
									U13.2	Candida parapsilosis
	BU14	8	M	43	Silicone coated latex	Yes	Monomicrobial colonisation	Mono-fungal biofilm	U14	Trichosporon asahii
	BU15	8	M	49	Silicone coated latex	Yes	Monomicrobial colonisation	Mono-fungal biofilm	U15	Trichosporon asahii
	BU16	7	M	56	Silicone coated latex	Yes	Monomicrobial colonisation	Mono-bacterial biofilm	U16	Staphylococcus haemolyticus
	BU17	10	F	78	Silicone coated latex	Yes	Polymicrobial colonisation	Poly-bacterial biofilm	U17.1	Enterococcus faecium
									U17.2	E. coli
									U17.3	Pseudomonas aeruginosa
	BU18	7	F	67	Silicone coated latex	Yes	Polymicrobial colonisation	Mixed-species biofilm	U18.1	E. coli
									U18.2	Candida albicans
	BU19	7	M	44	Silicone coated latex	Yes	Monomicrobial colonisation	Mono-fungal biofilm	U19	Candida kefyr
	BU20	13	F	48	Silicone coated latex	Yes	Polymicrobial colonisation	Mixed-species biofilm	U20.1	Enterobacter hormaechei
									U20.2	Candida parapsilosis
	BU21	3	M	44	Silicone coated latex	No	No colonisation	-	-	-
	BU22	3	M	65	Silicone coated latex	No	No colonisation	-	-	-
	BU23	9	F	41	Silicone coated latex	Yes	Polymicrobial colonisation	Mixed-species biofilm	U23.1	Klebsiella pneumoniae
									U23.2	Candida albicans
	BU24	5	M	53	Silicone coated latex	Yes	Monomicrobial colonisation	Mono-fungal biofilm	U24	Candida tropicalis
	BU25	5	F	57	Silicone coated latex	Yes	Polymicrobial colonisation	Mixed-species biofilm	U25.1	Candida auris
									U25.2	E. coli
	BU26	7	F	62	Silicone coated latex	Yes	Polymicrobial colonisation	Poly-bacterial biofilm	U26.1	Staphylococcus haemolyticus
									U26.2	Enterococcus avium
									U26.3	Pseudomonas aeruginosa
	BU27	9	F	44	Silicone coated latex	Yes	Monomicrobial colonisation	Mono-bacterial biofilm	U27	Enterococcus faecium
	BU28	10	F	49	Silicone coated latex	Yes	Monomicrobial colonisation	Mono-fungal biofilm	U28	Candida tropicalis
