# Supplementary material for: Insights into urinary catheter colonisation and polymicrobial biofilms of Candida- bacteria under flow condition
Source: Research Square preprint supplement (doi:10.21203/rs.3.rs-5407606/v1), 2025-04-14
Supplement: Supplementary file 2 [file 9e834693779d7b6226535a54.docx]

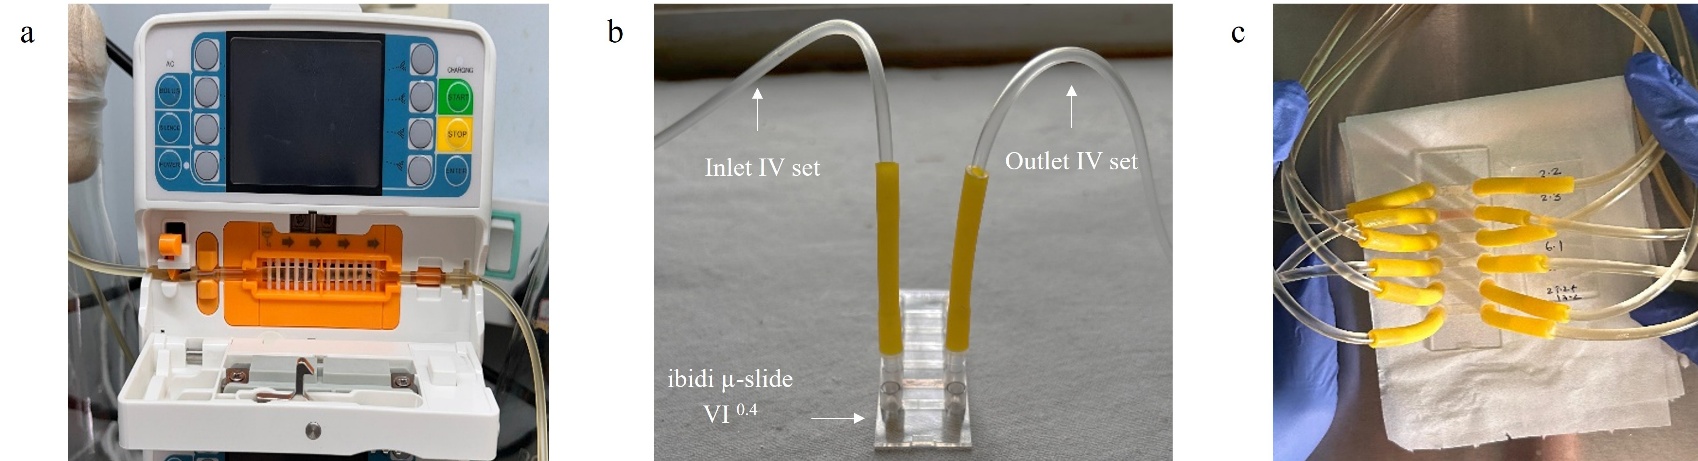


**Supplementary figure 1:** A closer look at the flow system: a) the passing of IV set through volumetric infusion pump that help in maintenance of flow rate, b) the connection of IV sets with the ibidi slide c) a closer look at of the slide after connecting all IV sets to the slide.
